# Supplementary material for: Significantly enhanced antibacterial activity of TiO2 nanofibers with hierarchical nanostructures and controlled crystallinity
Source: Royal Society of Chemistry journal article supplement (doi:10.1039/c4an01682c), 2014-11-11
Supplement: c4an01682c1.pdf [file c4an01682c1.pdf]

Supporting Information

## Significantly enhanced antibacterial activity of TiO<sub>2</sub> nanofibers with hierarchical nanostructures and controlled crystallinity

*Won Seok Lee,<sup>1,3</sup> Yang-Seok Park,<sup>1</sup> Yoon-Kyoung Cho<sup>1,2,\*</sup>*

<sup>1</sup>*School of Life Sciences, Ulsan National Institute of Science and Technology (UNIST), UNIST-gil 50, Ulsan 689-798, Republic of Korea;*

<sup>2</sup>*Center for Soft and Living Matter, Institute for Basic Science (IBS), UNIST-gil 50, Ulsan 689-798, Republic of Korea*

<sup>3</sup>*Current Address : Agency for Defense Development (ADD), Yuseong PO Box 35-1, Daejeon, 305-600, Republic of Korea*

E-mail: [ykcho@unist.ac.kr](mailto:ykcho@unist.ac.kr)

Fax: +82-52-217-2509; Tel: +82-52-217-2511

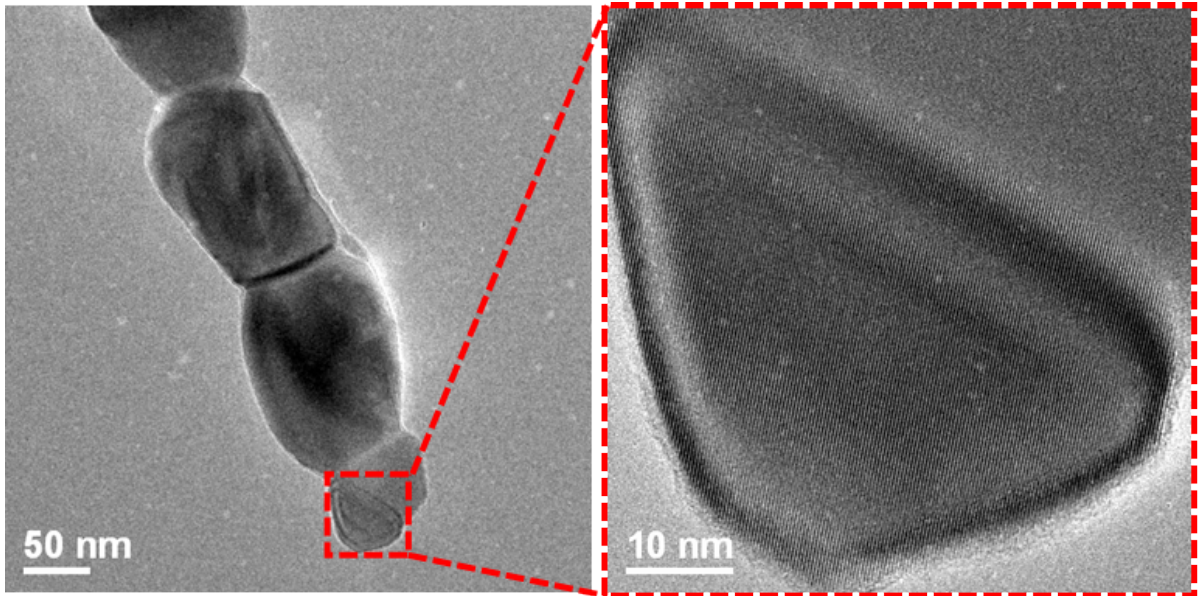

**Fig. S1** TEM studies showing the grain size and its crystallinity of rutile-TiO<sub>2</sub> nanofiber.

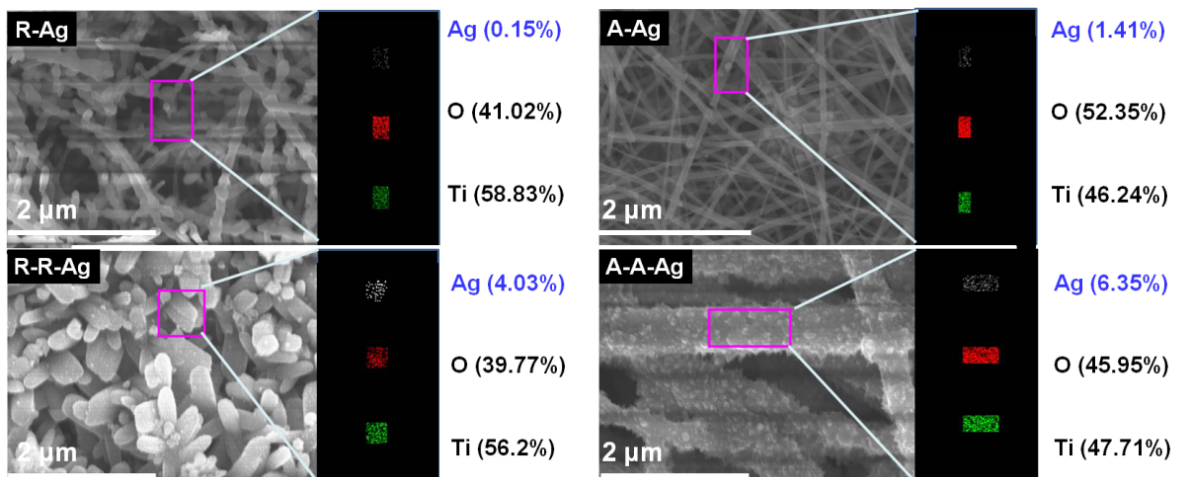

**Fig. S2** SEM-EDS analysis of Ag-decorated pure- and hierarchical TiO<sub>2</sub> NFs showing the element distribution of Ag, O, and Ti.
